# Supplementary material for: Dissection of the Octoploid Strawberry Genome by Deep Sequencing of the Genomes of Fragaria Species
Source: PubMed Central journal article supplement (PMC3989489; doi:10.1093/dnares/dst049), 2013-11-26
Supplement: supp_dst049_dst049supp_fig4.pdf [file supp_dst049_dst049supp_fig4.pdf]

Chr 1

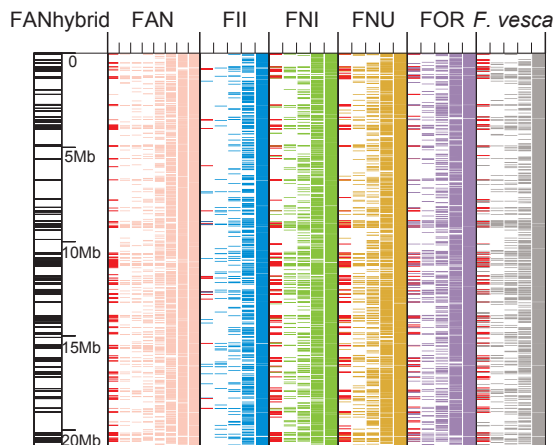

Chr 2

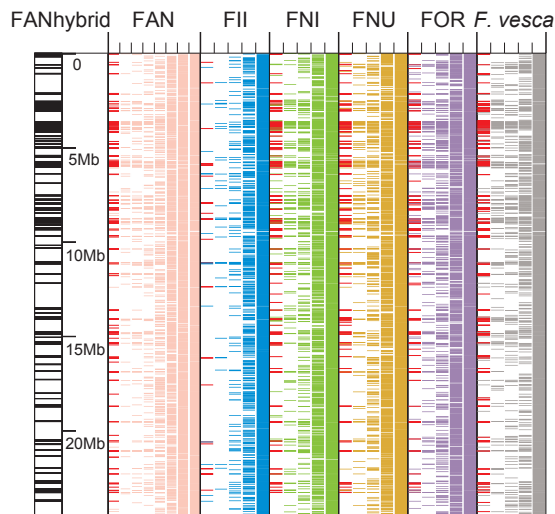

Chr 3

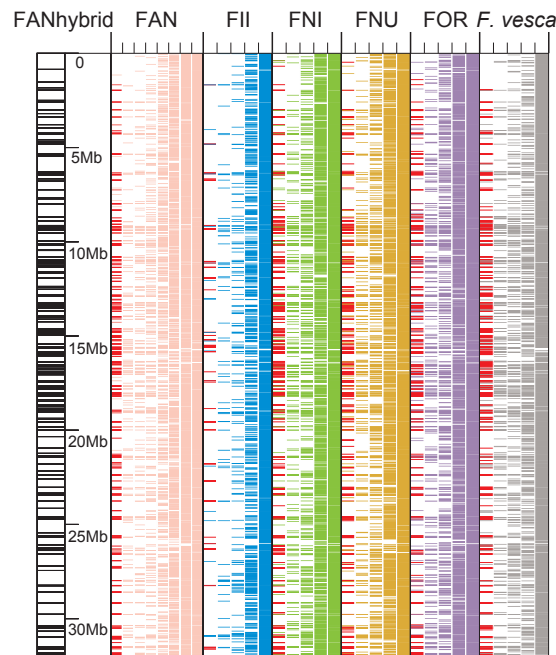

Chr 4

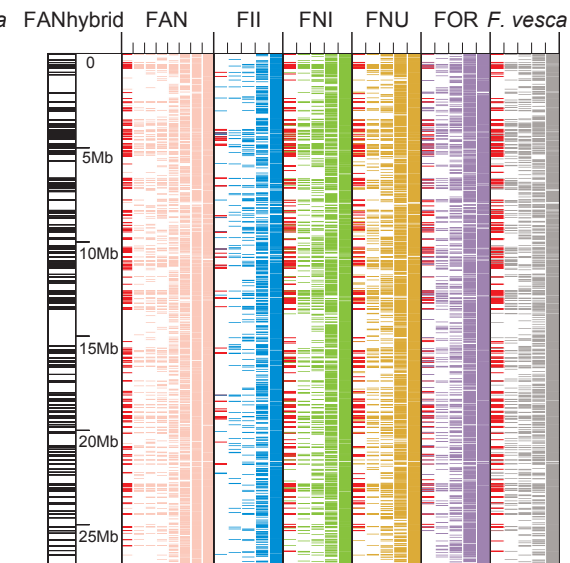

Chr 5

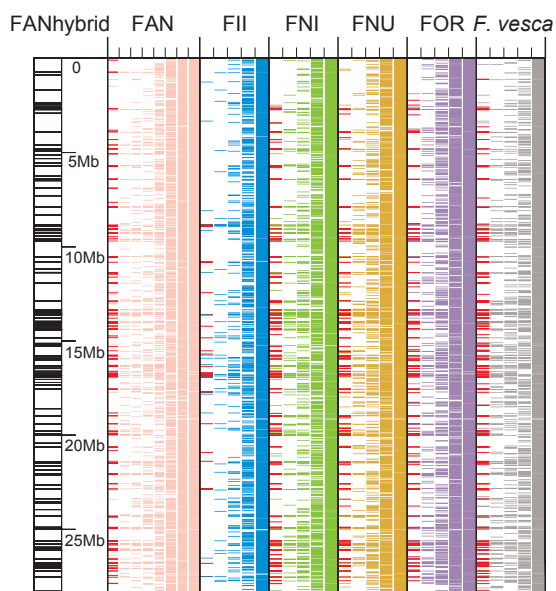

Chr 6

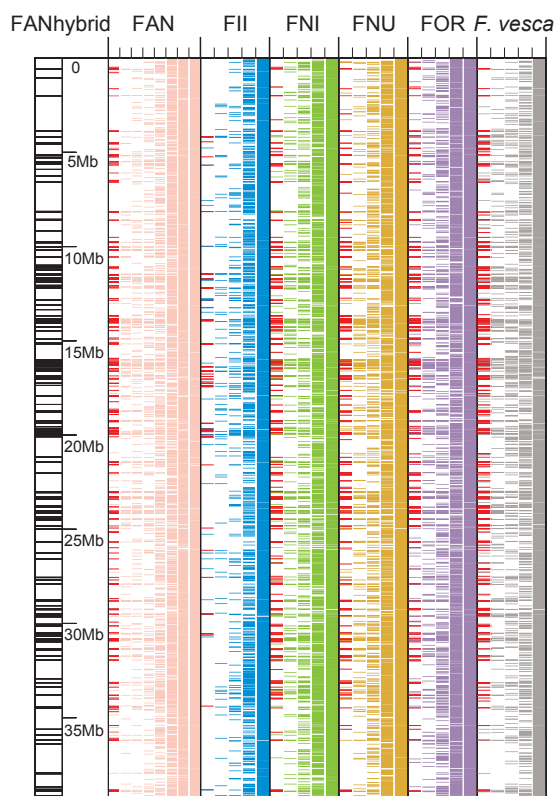

Chr 7

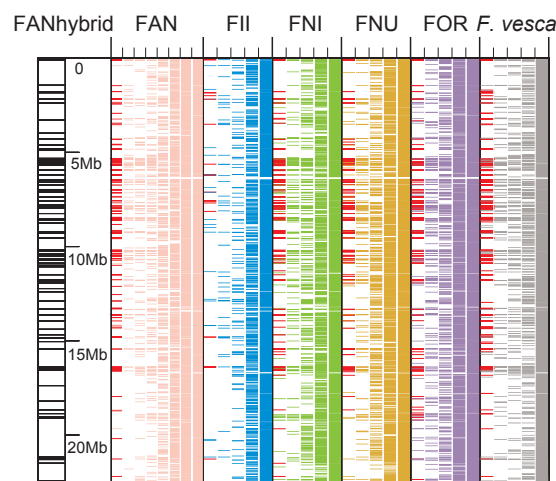

Chr 0

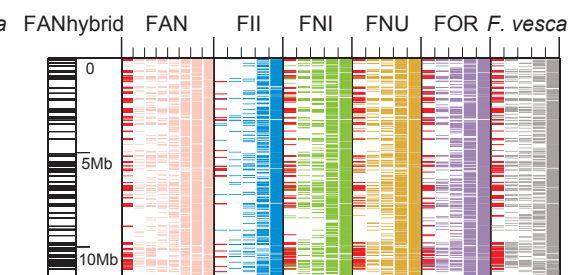

**Supplemental Figure S4:** Position and coverage of the Illumina-assembled genome sequences mapped onto the FANhybrid\_r1.2 sequences. The left-most bars indicate FANhybrid\_r1.2 genome sequences aligned with the genome of *F. vesca* (v1.1). Black bars represent repeat sequences. Pink, blue, green, yellow, purple, and grey bars indicate absence of homologous sequences between FANhybrid\_r1.2 and FAN\_r1.1, FII\_r1.1, FNI\_r1.1, FNU\_r1.1, FOR\_r1.1, and *F. vesca* (v1.1), respectively. The X axis on each colored bar shows the mapped coverage of the sequences. In FAN\_r1.1, the scales on the X axis from right to left represent one to eight fold coverage. In the other assembled genome sequences, the scales on the X axis from right to left show one- to five-fold coverage. Sequences with absence of homologous sequences with more than eightfold (FAN\_r1.1) or five-fold (other assembled genomes) coverage are shown by red bars.
