# Supplementary material for: Dissection of the Octoploid Strawberry Genome by Deep Sequencing of the Genomes of Fragaria Species
Source: PubMed Central journal article supplement (PMC3989489; doi:10.1093/dnares/dst049), 2013-11-26
Supplement: supp_dst049_dst049supp_fig5.pdf [file supp_dst049_dst049supp_fig5.pdf]

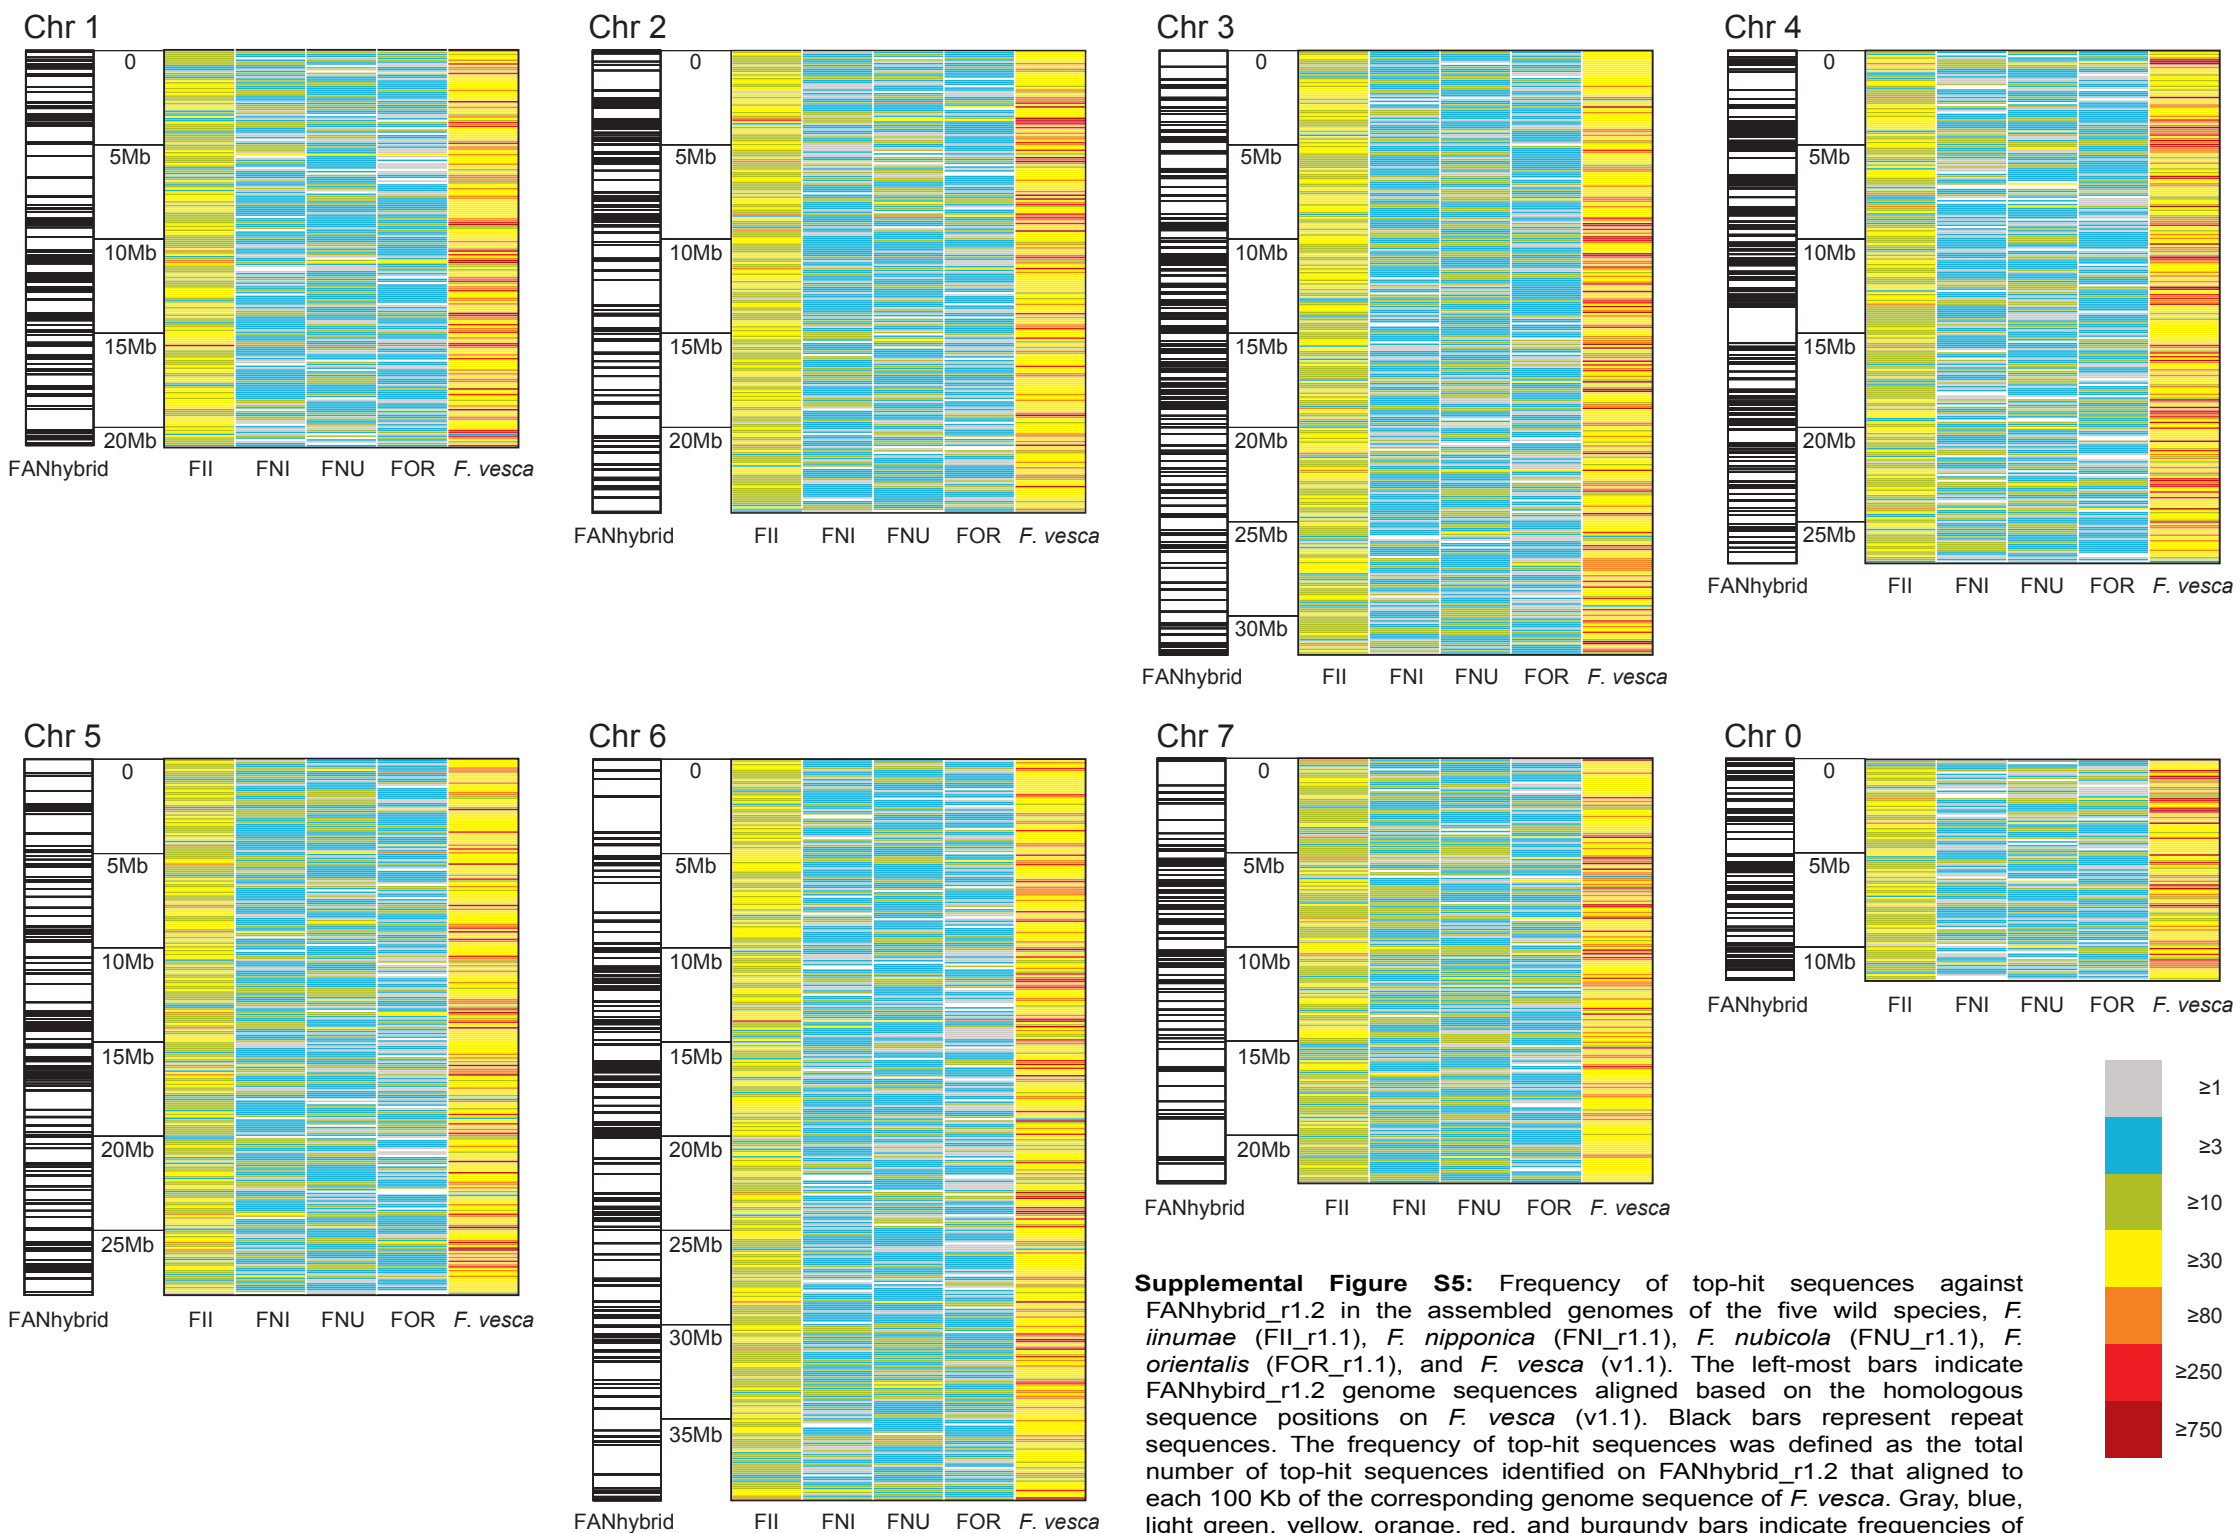

**Supplemental Figure S5:** Frequency of top-hit sequences against FANhybrid\_r1.2 in the assembled genomes of the five wild species, *F. iinumae* (FII\_r1.1), *F. nipponica* (FNI\_r1.1), *F. nubicola* (FNU\_r1.1), *F. orientalis* (FOR\_r1.1), and *F. vesca* (v1.1). The left-most bars indicate FANhybrid\_r1.2 genome sequences aligned based on the homologous sequence positions on *F. vesca* (v1.1). Black bars represent repeat sequences. The frequency of top-hit sequences was defined as the total number of top-hit sequences identified on FANhybrid\_r1.2 that aligned to each 100 Kb of the corresponding genome sequence of *F. vesca*. Gray, blue, light green, yellow, orange, red, and burgundy bars indicate frequencies of  $\geq 1$ ,  $\geq 3$ ,  $\geq 10$ ,  $\geq 30$ ,  $\geq 80$ ,  $\geq 250$ , and  $\geq 750$  sequences per 100 Kb, respectively.
